# Supplementary material for: Scaling methods of leakage correction in GRACE mass change estimates revisited for the complex hydro-climatic setting of the Indus basin
Source: Copernicus journal article supplement (doi:10.5194/hess-2022-43), 2022-02-14
Supplement: Supplementary file 1 [file Data for time series and periodogram plots.xlsx]

## Sheet: Figure 4
Figure 4 Data: Units kg
GRACE SH Mean of JPL, CSR and GFZ	CSR Mascon	Formal Errors
7.94033e+13	7.88317e+13	5.32883e+12
8.5884e+13	6.46962e+13	4.74525e+12
3.82846e+13	39206013555563	3.58631e+12
29756738761147	5.50154e+13	6.5137e+12
2.69941e+13	2.40285e+13	3.54038e+12
3.39353e+12	2.14661e+12	3.50578e+12
1.6045e+13	-1.96808e+13	3.86266e+12
2.49072e+13	1.1706e+13	4.78286e+12
4.27064e+13	4.12303e+13	3.87895e+12
8.12461e+13	8.66295e+13	3.3275e+12
7.02526e+13	6.46139e+13	3.13776e+12
7.43311e+13	8.22451e+13	3.62763e+12
6.32554e+13	7.42555e+13	2.88747e+12
8.9138e+13	9.07995e+13	2.90268e+12
9.05292e+13	8.75285e+13	2.87669e+12
5.86844e+13	5.01697e+13	2.88792e+12
43147935879806	2.42635e+13	2.95914e+12
47485718165387	3.13807e+13	2.86158e+12
4.50871e+13	4.01473e+13	4.29263e+12
7.54223e+13	6.38675e+13	2.95809e+12
3.87048e+13	2.8233e+13	2.7837e+12
2.21873e+13	2.02817e+13	2.9233e+12
7.16552e+12	9.95782e+12	3.25379e+12
-5.48468e+12	-1.76741e+13	3.31543e+12
-2.97545e+13	-2.95047e+13	3.42074e+12
-2.43307e+13	-3.50051e+13	3.21237e+12
6.92125e+11	-1.68773e+13	2809512139771
5.96455e+13	5.24073e+13	3.04036e+12
9.64025e+13	100215825822793	3.07566e+12
7.97838e+13	9.15941e+13	3.00242e+12
8.35892e+13	89747227233706	3070981668259
4.42782e+13	5.79076e+13	3.18006e+12
7.26202e+13	6.98454e+13	2.98758e+12
6.05488e+13	5.72389e+13	2.98271e+12
4.86664e+13	5.17085e+13	2.997e+12
3.28949e+13	3.0339e+13	2.9076e+12
1.23707e+13	7.7928e+12	2.9961e+12
-7.04289e+12	-2.32673e+13	3.76852e+12
1.44367e+13	-2.48261e+12	3.18055e+12
1.48447e+13	25151452424127	3.20126e+12
3.50434e+13	5.08477e+13	3.00794e+12
2.54269e+13	3.39395e+13	2.98834e+12
-4.62878e+12	-1.3433e+13	2.88751e+12
-32211054453612	-2.68515e+13	3.25891e+12
-11694533119089	-1.09214e+13	3.20557e+12
4.27104e+13	4.74221e+13	2.86139e+12
51226447060533	5.5223e+13	3.17953e+12
-1.88766e+12	-3.0516e+11	2.9937e+12
-1.11275e+13	-9.44898e+12	2.8984e+12
24523326252199	1.58622e+13	3.08017e+12
2.24617e+13	3.10585e+13	3.09328e+12
4.04677e+13	4.51091e+13	3.04259e+12
8.20123e+13	9.07987e+13	2.89243e+12
5.97874e+13	7.07577e+13	2.92797e+12
1.92192e+13	34402443212653	2.89714e+12
9.98031e+12	2.87008e+13	2.91264e+12
4.1955e+13	5.83792e+13	2.87423e+12
5.16024e+13	5.31873e+13	3.11011e+12
2.2246e+13	3.26819e+13	3.27026e+12
-6.08351e+12	-3.30806e+12	3.29238e+12
-3.76554e+13	-2.96356e+13	3.44398e+12
-3.68391e+13	-3.32934e+13	3.23399e+12
-2.34099e+13	-8.39595e+12	3.10455e+12
4.22828e+12	1.33877e+13	3.4734e+12
5.08429e+12	1.13081e+13	3.1147e+12
3.12602e+12	6.79033e+12	3.41447e+12
-2.80547e+13	-1.53492e+13	3.31082e+12
-2.81341e+13	-2.75916e+13	2.98684e+12
-9.70703e+11	-2.39513e+12	3.12286e+12
4.81348e+13	3.51334e+13	2.98984e+12
5.56195e+12	1.64355e+13	3.04001e+12
-1.14395e+13	-8.02941e+12	2.98541e+12
-3.14365e+13	-3.05171e+13	3.3484e+12
-2.85706e+13	-3.00359e+13	3.2639e+12
-6.52268e+12	-1.50538e+13	3.19452e+12
-5.52056e+09	-1.65273e+12	3.38773e+12
1.78308e+13	2.22371e+13	3.44348e+12
2.28296e+13	3.47808e+13	3.01053e+12
3.11428e+12	6.85397e+12	2.94665e+12
-2.91978e+13	-27722217368648	3.0796e+12
-3.00564e+13	-1.24825e+13	3.48894e+12
-3.17865e+13	-2.69195e+13	3.39015e+12
-2.89059e+13	-2.37e+13	3.4074e+12
-74107551196162	-5.42966e+13	3.63496e+12
-8.57018e+13	-8.12496e+13	3.6405e+12
-6.90569e+13	-73841751108301	3.6564e+12
-6.17448e+13	-56071914890553	3.63339e+12
-3.83744e+13	-2.72783e+13	3.65578e+12
-4.92598e+13	-2.83816e+13	3.60733e+12
-73218287989735	-7.13465e+13	3.53358e+12
-7.63685e+13	-7.14899e+13	3.40848e+12
-7.35214e+13	-5.8151e+13	3.94593e+12
-56627801022854	-2.76127e+13	3.07404e+12
4.20581e+13	55075115739115	2.85611e+12
3.82201e+13	4.57626e+13	2.87299e+12
8.85517e+12	4.45123e+12	2.91215e+12
-1.88175e+13	-2.73626e+13	2.96021e+12
-2.97825e+13	-3.56704e+13	3.07388e+12
2.25831e+13	2.02008e+13	3.60694e+12
2.66205e+13	2.57754e+13	3.01519e+12
1.83601e+13	2.61054e+13	2.94697e+12
-10966172942453	-3.7893e+12	2.86855e+12
-2.46882e+13	-1.11079e+13	3.08836e+12
2.46913e+12	1.10215e+12	3.00882e+12
5.31083e+13	5.02633e+13	2.97362e+12
1.73318e+13	8.82091e+12	2.90721e+12
7.58497e+10	-5.41429e+12	2.91175e+12
-6.92423e+12	-1.76612e+13	2.76881e+12
-1.41406e+11	-1.75165e+13	2.9369e+12
1.70048e+13	7.99143e+12	2.97232e+12
-3.16831e+13	-3.73367e+13	2.84223e+12
8.9852e+12	1.51054e+13	3.01241e+12
-3.93395e+13	-48489957508205	2.92794e+12
-6.08089e+13	-7.73537e+13	2.76866e+12
-4.71616e+13	-5.28789e+13	2.70996e+12
-9.19085e+12	-2.06579e+13	2.84614e+12
-2.65559e+12	3.49387e+11	3.11289e+12
-2.94079e+13	-2.14273e+13	2.71104e+12
-4.20749e+13	-4.06025e+13	2.80026e+12
-2.18053e+13	-3.2384e+13	2.74148e+12
-2.44162e+13	-3.54544e+13	2.74478e+12
-5.13832e+13	-5.51572e+13	2.81389e+12
-6.61965e+13	-8.1769e+13	3.10795e+12
-4.90433e+13	-6.6767e+13	4250686289052
-1.25412e+13	-1.10836e+13	2.71868e+12
-1.54386e+13	-1.73294e+13	2.74279e+12
-7.03717e+12	4.51307e+11	2.60511e+12
-37661669525761	-3.72884e+13	2.80035e+12
-4.30567e+13	-46843038160772	2.64565e+12
-3.29662e+13	-3.4516e+13	2.66545e+12
-4.94885e+13	-51124996091309	2.6224e+12
-5.82688e+13	-7.09953e+13	2.66831e+12
-13925549553367	-1.91074e+13	2.7784e+12
4.02317e+12	6.38719e+12	2.65561e+12
1.60786e+11	6.48941e+12	3.19975e+12
3.92665e+13	34279386943308	2.58214e+12
-1.3016e+13	-1.6355e+13	2.69933e+12
-5.50031e+13	-8.33202e+13	2.969e+12
-6.42412e+13	-6.87958e+13	2.80653e+12
-51595193392121	-6.26937e+13	2.58575e+12
-3.208e+13	-4.26751e+13	2.62231e+12
-7.06304e+13	-6.37676e+13	3.03317e+12
-88504649721594	-82757552947028	2.76339e+12
-6.38286e+13	-6.73467e+13	2.84786e+12
-3.72347e+13	-2.85209e+13	3.86925e+12
-111824095177616	-122504750760827	3.3316e+12
-142439612138101	-142009823866605	3.27258e+12

## Sheet: Figure 5
Figure 5 Data: Units kg
GRACE SH	Standard WGHM	Integrated WGHM
7.94033e+13	6.79292e+13	145387334694392
8.5884e+13	6.838e+13	146362314161182
3.82846e+13	5.42104e+13	126345208402008
29756738761147	6.01509e+13	131554325992908
2.69941e+13	7.52664e+13	140887292448706
3.39353e+12	5.1383e+13	110941071824718
1.6045e+13	3.40369e+13	9.28042e+13
2.49072e+13	2.87023e+13	8.78504e+13
4.27064e+13	2.91104e+13	8.84393e+13
8.12461e+13	5.88468e+13	118265205928561
7.02526e+13	108381396039105	166309861144037
7.43311e+13	105800214539691	161054336560419
6.32554e+13	73704213923921	131770866722223
8.9138e+13	8.89241e+13	149079041206368
9.05292e+13	9.79826e+13	157025803760645
5.86844e+13	8.50209e+13	139877894388474
43147935879806	6.69314e+13	116684142277574
47485718165387	5.30456e+13	100362921728193
4.50871e+13	5.1606e+13	9.94216e+13
7.54223e+13	6.17243e+13	109838407422992
3.87048e+13	77533698242659	125503225598028
2.21873e+13	7.31053e+13	119038335139594
7.16552e+12	6.87083e+13	113716922645541
-5.48468e+12	7.05688e+13	116009665840196
-2.97545e+13	2.75177e+13	6.80785e+13
-2.43307e+13	1.23804e+13	5.24524e+13
6.92125e+11	7.42466e+12	4.74651e+13
5.96455e+13	2.8922e+13	6.89488e+13
9.64025e+13	7.87221e+13	118598293933705
7.97838e+13	8.74252e+13	124020061261868
8.35892e+13	74083573797838	110897600759140
4.42782e+13	5.60924e+13	9.50815e+13
7.26202e+13	3.78077e+13	7.90339e+13
6.05488e+13	4.95116e+13	9.26452e+13
4.86664e+13	3.84205e+13	8.09499e+13
3.28949e+13	2.85921e+13	6.80928e+13
1.23707e+13	1.12865e+13	4.80957e+13
-7.04289e+12	-6.59987e+12	2.95066e+13
1.44367e+13	-1.46332e+13	2.15707e+13
1.48447e+13	1.00004e+13	4.56921e+13
3.50434e+13	1.90392e+13	5.56185e+13
2.54269e+13	28678057159578	6.34865e+13
-4.62878e+12	3.33013e+13	6.41316e+13
-32211054453612	1.88769e+13	5.01117e+13
-11694533119089	-1.13976e+11	3.30377e+13
4.27104e+13	1.70568e+13	52048896698413
51226447060533	5.31609e+13	8.54826e+13
-1.88766e+12	4.87827e+13	7.60114e+13
-1.11275e+13	1.55003e+13	3.79427e+13
24523326252199	7.02824e+12	2.91842e+13
2.24617e+13	2.94554e+13	5.2267e+13
4.04677e+13	2.6787e+13	4.72683e+13
8.20123e+13	4.42399e+13	6.37407e+13
5.97874e+13	8.36389e+13	101464834144853
1.92192e+13	7.11509e+13	8.80224e+13
9.98031e+12	3.79891e+13	5.63204e+13
4.1955e+13	2.52676e+13	45430887801963
5.16024e+13	3.19092e+13	5.21873e+13
2.2246e+13	26409116808382	4.51775e+13
-6.08351e+12	1.30757e+13	2.88645e+13
-3.76554e+13	-1.19475e+13	6.2937e+11
-3.68391e+13	-3.12946e+13	-1.9752e+13
-2.34099e+13	-3.64869e+13	-2.45556e+13
4.22828e+12	-1.14908e+13	2.03463e+11
5.08429e+12	7.8432e+12	1.99155e+13
3.12602e+12	4.01565e+12	1.47326e+13
-2.80547e+13	1.41719e+13	2.10056e+13
-2.81341e+13	-6.09236e+12	5.1939e+11
-9.70703e+11	-9.00312e+12	-1.06849e+12
4.81348e+13	-1.89784e+12	6.46058e+12
5.56195e+12	2.87854e+13	34490647980068
-1.14395e+13	1.18831e+13	1.24007e+13
-3.14365e+13	-1.60063e+13	-1.87709e+13
-2.85706e+13	-2.98374e+13	-3.34912e+13
-6.52268e+12	-23135478925967	-2.63545e+13
-5.52056e+09	-4.52589e+12	-7.37535e+12
1.78308e+13	2.42626e+13	2.02761e+13
2.28296e+13	2.85312e+13	2.06759e+13
3.11428e+12	33732390734645	2.54176e+13
-2.91978e+13	1.14778e+13	3.95943e+12
-3.00564e+13	-1.29866e+13	-1.89264e+13
-3.17865e+13	-2.29878e+13	-2.7145e+13
-2.89059e+13	-2.48264e+13	-2.8886e+13
-74107551196162	-2.79388e+13	-3.53533e+13
-8.57018e+13	-5.26895e+13	-6.26408e+13
-6.90569e+13	-6.48718e+13	-7.53337e+13
-6.17448e+13	-68453845002899	-7.81143e+13
-3.83744e+13	-6.71663e+13	-7.69565e+13
-4.92598e+13	-3.349e+13	-4.4177e+13
-73218287989735	-2.00314e+13	-2.81911e+13
-7.63685e+13	-2.78071e+13	-4.0728e+13
-7.35214e+13	-34644782450809	-4.69368e+13
-56627801022854	-3.51836e+13	-4.62266e+13
4.20581e+13	-1.93448e+13	-2.92881e+13
3.82201e+13	3.46938e+13	2.23127e+13
8.85517e+12	16088379687285	-1.60808e+12
-1.88175e+13	-1.90294e+13	-4.04856e+13
-2.97825e+13	-3.76614e+13	-6.00849e+13
2.25831e+13	-4.35658e+13	-6.61664e+13
2.66205e+13	-1.32762e+13	-3.60707e+13
1.83601e+13	6.1158e+12	-1.76088e+13
-10966172942453	7.76555e+11	-2.29786e+13
-2.46882e+13	-3.66667e+13	-5.72725e+13
2.46913e+12	-2.90057e+13	-4.79998e+13
5.31083e+13	-1.16058e+13	-3.1499e+13
1.73318e+13	9.04027e+12	-15410942659787
7.58497e+10	-2.70886e+13	-5.6108e+13
-6.92423e+12	-5.29734e+13	-8.20885e+13
-1.41406e+11	-4.20792e+13	-7.1537e+13
1.70048e+13	-2.54024e+13	-5.53784e+13
-3.16831e+13	-6.54814e+13	-9.52951e+13
8.9852e+12	-5.14214e+13	-8.10334e+13
-3.93395e+13	-4.60727e+13	-8.49447e+13
-6.08089e+13	-6.98284e+13	-109239939151700
-4.71616e+13	-7.01258e+13	-108816589299946
-9.19085e+12	-5.77508e+13	-9.67858e+13
-2.65559e+12	7.10594e+12	-34434057247488
-2.94079e+13	7.56642e+12	-3.58211e+13
-4.20749e+13	-1.89098e+13	-6.12216e+13
-2.18053e+13	-3.23422e+13	-7.30765e+13
-2.44162e+13	-2.41333e+13	-7.43711e+13
-5.13832e+13	-5.20211e+13	-105424981975674
-6.61965e+13	-5.8422e+13	-112611221951447
-4.90433e+13	-69393094542331	-124325668214144
-1.25412e+13	-4.01457e+13	-9.59711e+13
-1.54386e+13	-1.66914e+13	-7.32281e+13
-7.03717e+12	-9.37599e+12	-6.67394e+13
-37661669525761	-3.29764e+13	-8.84879e+13
-4.30567e+13	-6.54415e+13	-115908612277313
-3.29662e+13	-66995975923939	-117064241513430
-4.94885e+13	-4.46631e+13	-9.92792e+13
-5.82688e+13	-7.50158e+13	-133452234337892
-13925549553367	-7.40003e+13	-134049096583290
4.02317e+12	-1.26167e+13	-7.33195e+13
1.60786e+11	-50585120276719	-113970207994912
3.92665e+13	-3.34774e+13	-9.58159e+13
-1.3016e+13	-3.02856e+12	-6.79495e+13
-5.50031e+13	-6.52641e+13	-138390391522929
-6.42412e+13	-7.4237e+13	-147637673204704
-51595193392121	-7.73326e+13	-150407821912773
-3.208e+13	-7.21805e+13	-145121115525844
-7.06304e+13	-4.87067e+13	-122881096404989
-88504649721594	-7.23724e+13	-144632102381112
-6.38286e+13	-9.10363e+13	-161092828383592
-3.72347e+13	-8.31508e+13	-151595998501112
-111824095177616	-119418670055805	-194987751374214
-142439612138101	-138219759581221	-214505812824691

## Sheet: Figure 6
Figure 6 Data
	(a) GRACE SH	(b) Standard WGHM	(c) Integrated WGHM	(d) Filtered Standard WGHM	(e) Filtered Integrated WGHM
Frequency f (year-1)	Power (dB)	Power (dB)	Power (dB)	Power (dB)	Power (dB)
0.0170455	0.00240851	9.78652e-05	0.00596294	0.00683783	2.10301e-05
0.0340909	0.0573059	0.0132843	0.0637527	0.14069	0.0183765
0.0511364	0.422748	0.150633	0.219201	0.880517	0.20848
0.0681818	1.38238	0.646172	0.458941	2.28202	1.00937
0.0852273	2.84086	1.50016	0.968019	3.98888	2.41453
0.102273	4.3928	2.37926	1.42947	5.31729	3.64305
0.119318	5.23378	2.48137	1.89587	4.72378	4.01984
0.136364	4.11136	1.25704	1.50931	2.11425	2.54463
0.153409	2.58898	0.38859	0.811971	0.781054	1.31234
0.170455	1.65628	0.455653	0.462848	1.13564	1.15469
0.1875	1.27047	0.753397	0.27593	1.66584	1.14773
0.204545	1.65814	0.418157	0.0703679	1.19013	0.714192
0.221591	3.04712	0.166023	0.283854	0.549087	0.387864
0.238636	5.16862	1.77837	2.12219	2.00942	2.08561
0.255682	7.10841	5.14408	5.30686	5.61493	5.74723
0.272727	7.3814	6.86121	6.94466	7.42046	7.69689
0.289773	6.1133	5.26779	5.42679	5.54766	5.93378
0.306818	4.2514	2.2968	2.34759	2.18839	2.38968
0.323864	2.82779	0.44029	0.284829	0.194344	0.144032
0.340909	2.01085	0.420153	0.318513	0.376351	0.396119
0.357955	1.07485	0.598951	0.732388	0.807934	1.02623
0.375	0.522945	0.446065	0.512977	0.803059	0.868713
0.392045	1.00145	1.24589	0.835896	1.70889	1.29521
0.409091	1.77266	3.23032	2.47302	3.70681	3.07825
0.426136	1.66715	4.84175	4.02635	4.86984	4.39516
0.443182	1.34629	5.28985	4.33619	4.3765	3.96299
0.460227	2.53433	5.45851	4.09663	3.67819	2.97766
0.477273	5.74281	6.48233	4.84897	4.57516	3.63031
0.494318	8.68635	7.2145	6.05386	5.93399	5.40239
0.511364	8.62781	5.90967	5.5741	5.10755	5.3181
0.528409	6.75553	4.03119	3.79278	2.8552	3.15315
0.545455	7.05045	4.56408	3.51882	2.71513	2.26051
0.5625	10.0521	7.22048	5.47087	5.62268	4.43071
0.579545	11.6226	8.47022	6.9793	8.26269	7.13866
0.596591	8.88207	6.42825	5.86171	7.50204	7.07382
0.613636	4.20433	3.15205	3.35624	4.40775	4.6084
0.630682	1.13174	1.06313	1.50846	1.72759	2.13879
0.647727	0.452752	0.348549	0.637799	0.514731	0.807261
0.664773	0.724852	0.10225	0.171823	0.174386	0.278637
0.681818	0.649905	0.0147478	0.030196	0.00883807	0.0175442
0.698864	0.480539	0.444065	0.602844	0.131456	0.193098
0.715909	0.529466	1.18945	1.50064	0.582957	0.76946
0.732955	0.613208	1.67217	1.95384	0.965957	1.20722
0.75	0.47099	1.6292	1.69309	0.971878	1.12351
0.767045	0.220763	1.35451	1.2228	0.737278	0.749519
0.784091	0.275393	1.34849	1.26823	0.686867	0.693456
0.801136	0.852915	1.59904	1.81247	0.907179	1.09229
0.818182	1.66694	1.73405	2.25981	1.06372	1.45096
0.835227	1.96399	1.46563	2.03923	0.891826	1.27946
0.852273	1.38306	0.891282	1.14823	0.55713	0.693509
0.869318	0.731008	0.591438	0.431682	0.570621	0.427956
0.886364	0.975559	0.950018	0.638896	1.10284	0.901519
0.903409	1.597	1.33059	1.1681	1.49661	1.43526
0.920455	1.37373	0.962355	0.94463	1.18086	1.24702
0.9375	0.475806	0.677161	0.735794	0.839966	1.01046
0.954545	0.874098	3.22152	3.75536	2.38576	2.9635
0.971591	3.28368	9.47572	11.2536	6.22328	7.76214
0.988636	5.29153	15.8962	18.9527	9.76211	12.2272
1.00568	4.69628	17.7176	20.8329	10.1711	12.5996
1.02273	1.96698	12.5852	14.4467	6.65468	8.0903
1.03977	0.170742	4.86207	5.3453	2.26764	2.63733
1.05682	0.520898	0.643841	0.614827	0.284655	0.255843
1.07386	1.42463	0.457915	0.576766	0.454962	0.5522
1.09091	1.34768	1.50695	1.73266	0.998867	1.21219
1.10795	0.598057	1.36443	1.44105	0.770247	0.892141
1.125	0.187513	0.559847	0.509341	0.26682	0.269433
1.14205	0.12478	0.188938	0.175025	0.0455361	0.0454737
1.15909	0.0936943	0.0667535	0.0892548	0.000439157	0.0053224
1.17614	0.0999819	0.0486106	0.028506	0.075279	0.0414586
1.19318	0.202441	0.358618	0.339504	0.433297	0.409141
1.21023	0.24964	1.21009	1.28581	1.08775	1.1676
1.22727	0.392056	1.78913	1.92037	1.52901	1.68651
1.24432	0.916832	1.52075	1.63598	1.51191	1.66147
1.26136	1.3554	0.805846	0.88403	1.14548	1.24128
1.27841	1.12244	0.436469	0.504114	0.742701	0.807908
1.29545	0.485841	0.503181	0.57535	0.429424	0.494364
1.3125	0.412966	0.526088	0.611973	0.189584	0.252333
1.32955	1.20914	0.414143	0.538326	0.0967003	0.154577
1.34659	1.73345	0.467891	0.628392	0.127748	0.187626
1.36364	1.17304	0.644706	0.781728	0.134246	0.192832
1.38068	0.248865	0.567054	0.62991	0.0777485	0.12386
1.39773	0.0288813	0.313963	0.332924	0.163125	0.20512
1.41477	0.468588	0.301142	0.316839	0.500131	0.545819
1.43182	0.870669	0.642953	0.644841	0.853145	0.8883
1.44886	0.936349	0.798246	0.755528	0.822359	0.819473
1.46591	1.05853	0.569682	0.504202	0.518746	0.493328
1.48295	1.29268	0.423998	0.380875	0.355592	0.351329
1.5	1.27669	0.646339	0.634205	0.426954	0.45937
1.51705	1.00465	0.982247	0.96162	0.545587	0.58283
1.53409	0.644923	1.00781	0.950514	0.497197	0.507221
1.55114	0.360035	0.601105	0.540971	0.278993	0.270741
1.56818	0.236699	0.233347	0.206049	0.164524	0.159337
1.58523	0.23524	0.202226	0.170871	0.289648	0.259012
1.60227	0.336838	0.35615	0.263229	0.510847	0.415
1.61932	0.587505	0.483361	0.325472	0.631589	0.485542
1.63636	1.07535	0.460877	0.302297	0.528402	0.398207
1.65341	1.58441	0.254513	0.172518	0.226516	0.172364
1.67045	1.53583	0.0373785	0.0291407	0.0146431	0.0202752
1.6875	0.890091	0.0218256	0.0205012	0.0864067	0.0896134
1.70455	0.18842	0.152856	0.121768	0.2591	0.229116
1.72159	0.0794251	0.182242	0.141654	0.230124	0.188401
1.73864	0.447623	0.0553577	0.0388212	0.0553844	0.0432711
1.75568	0.570853	0.0276632	0.0333543	0.076977	0.106092
1.77273	0.281346	0.199766	0.203517	0.312187	0.355471
1.78977	0.313104	0.319373	0.313608	0.401996	0.428327
1.80682	1.10796	0.237565	0.239848	0.23106	0.250475
1.82386	1.9757	0.249177	0.274673	0.20477	0.257116
1.84091	1.89917	0.568769	0.591061	0.524527	0.603708
1.85795	0.960894	0.881862	0.848255	0.786588	0.824864
1.875	0.149672	0.758377	0.665838	0.602148	0.565043
1.89205	0.0483177	0.325307	0.246592	0.233107	0.17491
1.90909	0.184723	0.179087	0.128999	0.196972	0.142622
1.92614	0.378509	0.830404	0.687157	0.905345	0.756717
1.94318	2.18204	2.89646	2.57509	3.28811	2.99092
1.96023	7.56383	7.1376	6.84913	8.75261	8.5227
1.97727	15.3301	13.3285	13.534	17.2535	17.4754
1.99432	20.8442	18.017	18.7911	23.843	24.5262
2.01136	19.5404	16.679	17.4506	22.0617	22.692
2.02841	11.8563	10.3414	10.6749	13.4732	13.6927
2.04545	3.72713	3.52043	3.50161	4.41202	4.35068
2.0625	0.379947	0.173534	0.178528	0.23157	0.250623
2.07955	1.07991	0.731948	0.84615	1.1995	1.31593
2.09659	1.89479	1.78995	1.74169	2.53531	2.47508
2.11364	1.18516	1.30315	1.05367	1.73628	1.48789
2.13068	0.139289	0.250478	0.0994446	0.31999	0.17753
2.14773	0.132208	0.175983	0.321634	0.331746	0.452608
2.16477	0.549199	0.757773	0.979035	1.13912	1.29502
2.18182	0.474283	0.823439	0.858162	1.13217	1.11369
2.19886	0.259584	0.303226	0.238528	0.369635	0.307283
2.21591	0.546289	0.0525743	0.148585	0.143171	0.279602
2.23295	0.971303	0.31781	0.550481	0.773184	1.02498
2.25	0.821776	0.523887	0.650352	1.30471	1.3856
2.26705	0.279046	0.431347	0.364042	1.15539	0.995335
2.28409	0.0893549	0.284316	0.171703	0.614988	0.425144
2.30114	0.292723	0.262502	0.227813	0.247969	0.18635
2.31818	0.308149	0.164194	0.162036	0.071187	0.0781455
2.33523	0.100172	0.0166209	0.0304242	0.00746654	0.0192344
2.35227	0.0161315	0.160994	0.263588	0.18224	0.248142
2.36932	0.0752149	0.491209	0.707187	0.429603	0.584803
2.38636	0.0584807	0.513942	0.722872	0.413384	0.545697
2.40341	0.000122191	0.202966	0.264386	0.214981	0.192427
2.42045	0.0923839	0.103008	0.0367897	0.255569	0.122887
2.4375	0.228127	0.338773	0.281309	0.490942	0.41646
2.45455	0.179736	0.417585	0.456264	0.468839	0.530699
2.47159	0.0421582	0.177872	0.239502	0.166736	0.254722
2.48864	0.0680336	0.105322	0.0451392	0.0572639	0.0304157
2.50568	0.178824	0.384844	0.181747	0.249908	0.121184
2.52273	0.126295	0.480266	0.288832	0.293431	0.198358
2.53977	0.0108076	0.139664	0.0910446	0.0573767	0.0525795
2.55682	0.167461	0.0967409	0.100171	0.137262	0.109928
2.57386	0.564457	0.965832	0.810569	0.866396	0.690253
2.59091	0.793035	1.92534	1.61953	1.50784	1.25353
2.60795	0.581752	1.82532	1.59336	1.29629	1.1353
2.625	0.173259	0.855968	0.805658	0.539452	0.509086
2.64205	0.0118224	0.181022	0.179614	0.118536	0.105157
2.65909	0.208773	0.383029	0.288621	0.338307	0.266087
2.67614	0.497385	0.748869	0.635238	0.594216	0.533468
2.69318	0.51526	0.528092	0.514532	0.389457	0.403372
2.71023	0.24312	0.0807439	0.111499	0.0486985	0.0741506
2.72727	0.0131011	0.0833897	0.061515	0.0811526	0.0527639
2.74432	0.1445	0.519063	0.508655	0.505306	0.480139
2.76136	0.474048	0.850315	0.949192	0.916854	0.959608
2.77841	0.54709	0.895873	1.00735	1.07999	1.11737
2.79545	0.278687	0.788714	0.739973	0.948813	0.874613
2.8125	0.147349	0.671542	0.496229	0.691419	0.544282
2.82955	0.570598	0.516054	0.415116	0.498319	0.41475
2.84659	1.23002	0.390731	0.405761	0.488519	0.484822
2.86364	1.52044	0.474044	0.437452	0.664857	0.618558
2.88068	1.22608	0.645598	0.476025	0.786451	0.642478
2.89773	0.695754	0.61818	0.435817	0.679456	0.520608
2.91477	0.327802	0.292579	0.214686	0.356944	0.266405
2.93182	0.195496	0.0121597	0.00717488	0.0727476	0.0422235
2.94886	0.241434	0.157831	0.184256	0.10565	0.124863
2.96591	0.415752	0.704945	0.820148	0.530659	0.650789
2.98295	0.613516	1.22539	1.44321	1.12126	1.34605
3	0.674856	1.32922	1.52484	1.48256	1.69972
3.01705	0.525484	0.98729	1.04358	1.35231	1.44541
3.03409	0.27156	0.484605	0.440156	0.832282	0.808718
3.05114	0.0842089	0.141706	0.110764	0.307626	0.26405
3.06818	0.0428141	0.041922	0.0546211	0.0646947	0.0585688
3.08523	0.117197	0.0677838	0.0789893	0.0624209	0.0765749
3.10227	0.20945	0.122836	0.120096	0.118324	0.126854
3.11932	0.261191	0.178412	0.18926	0.129096	0.133251
3.13636	0.300069	0.206213	0.233115	0.104982	0.110804
3.15341	0.324291	0.161881	0.180043	0.0679549	0.0700989
3.17045	0.25331	0.0729445	0.0741739	0.0252392	0.0220884
3.1875	0.0828136	0.00938086	0.00632721	0.000265872	6.64935e-05
3.20455	0.074333	0.00977865	0.017576	0.02839	0.0386787
3.22159	0.44123	0.113354	0.147386	0.15078	0.172197
3.23864	0.930962	0.374397	0.435135	0.375166	0.398331
3.25568	1.0284	0.68968	0.736756	0.581107	0.586315
3.27273	0.576657	0.788224	0.777095	0.588044	0.563193
3.28977	0.0889562	0.5455	0.489597	0.364054	0.321814
3.30682	0.0500996	0.167578	0.126887	0.0969459	0.0665111
3.32386	0.35998	0.000867256	0.000784208	0.0269265	0.0251668
3.34091	0.575389	0.0815297	0.0885709	0.130891	0.1489
3.35795	0.501741	0.144628	0.141386	0.18397	0.208857
3.375	0.314061	0.0887877	0.109183	0.107258	0.137131
3.39205	0.173566	0.0527485	0.113886	0.0346935	0.0666239
3.40909	0.159808	0.0767	0.140991	0.0426542	0.0688032
3.42614	0.283172	0.0413067	0.0680332	0.0550374	0.0704423
3.44318	0.485073	0.0789521	0.074735	0.144171	0.152015
3.46023	0.607783	0.546967	0.528122	0.539785	0.539728
3.47727	0.504514	1.36205	1.31675	1.18064	1.16811
3.49432	0.254947	1.8344	1.7666	1.55292	1.53844
3.51136	0.0554356	1.4397	1.39109	1.23965	1.24236
3.52841	0.0029867	0.570988	0.567541	0.523028	0.546271
3.54545	0.0562311	0.066445	0.0693538	0.0694529	0.0881132
3.5625	0.138517	0.145865	0.103705	0.10332	0.0871482
3.57955	0.188359	0.324705	0.249542	0.270298	0.219512
3.59659	0.181001	0.240796	0.186905	0.247989	0.195559
3.61364	0.1619	0.0613808	0.0492789	0.120595	0.100121
3.63068	0.191369	0.0162035	0.0253215	0.0636861	0.0844356
3.64773	0.226411	0.0380461	0.0509078	0.0516857	0.0951353
3.66477	0.169269	0.0125737	0.0319808	0.0215338	0.0621516
3.68182	0.0455743	0.0164928	0.0380674	0.0283074	0.0513152
3.69886	0.00955137	0.113442	0.123368	0.104527	0.111215
3.71591	0.146153	0.179905	0.177375	0.14838	0.145645
3.73295	0.327751	0.1422	0.132399	0.120143	0.106781
3.75	0.371147	0.0989895	0.0900733	0.108809	0.0913681
3.76705	0.277478	0.181541	0.173447	0.207092	0.191938
3.78409	0.170841	0.316688	0.305769	0.325664	0.307067
3.80114	0.113427	0.300254	0.288804	0.286887	0.259256
3.81818	0.114278	0.155585	0.146037	0.14237	0.112484
3.83523	0.173975	0.0456913	0.0401125	0.0352869	0.0199921
3.85227	0.244232	0.0228903	0.0145194	0.00317803	0.000775858
3.86932	0.252849	0.0547088	0.0296786	0.0323895	0.0203233
3.88636	0.226437	0.143759	0.0965885	0.152672	0.118017
3.90341	0.240969	0.282551	0.229283	0.342428	0.297875
3.92045	0.285462	0.389651	0.353249	0.478585	0.442248
3.9375	0.247472	0.381811	0.374945	0.462759	0.441775
3.95455	0.0995874	0.333144	0.359748	0.397465	0.398623
3.97159	0.00299284	0.368426	0.423564	0.440013	0.465201
3.98864	0.0343821	0.427507	0.488207	0.515761	0.543318
4.00568	0.0866296	0.380523	0.412425	0.465379	0.462541
4.02273	0.0694774	0.199161	0.188298	0.260143	0.223287
4.03977	0.0622681	0.0475025	0.0271786	0.0646792	0.0345339
4.05682	0.147198	0.0243624	0.0273589	0.00667616	0.00473636
4.07386	0.25478	0.0474442	0.0664495	0.0360297	0.0365005
4.09091	0.231442	0.0329921	0.0392112	0.0585727	0.037113
4.10795	0.108272	0.0025736	0.00030071	0.0466026	0.0255134
4.125	0.0161597	0.018277	0.0347123	0.0266344	0.0379956
4.14205	0.00228752	0.0746447	0.103586	0.0422042	0.0662441
4.15909	0.0185291	0.122927	0.126782	0.107661	0.0966529
4.17614	0.0157584	0.137011	0.106345	0.174305	0.124706
4.19318	0.00205448	0.100347	0.0708867	0.147364	0.101863
4.21023	0.0293232	0.0304913	0.0261171	0.0568067	0.0329385
4.22727	0.136169	0.00451166	0.00325053	0.0827518	0.0477959
4.24432	0.260678	0.110534	0.0841654	0.334977	0.257358
4.26136	0.266315	0.301081	0.258435	0.630167	0.528855
4.27841	0.115587	0.386149	0.356876	0.672566	0.595527
4.29545	2.40215e-05	0.288694	0.284764	0.480508	0.448044
4.3125	0.139567	0.10377	0.117002	0.239178	0.2464
4.32955	0.426098	0.0115364	0.0160489	0.103443	0.120272
4.34659	0.550436	0.0599255	0.0367773	0.0743895	0.0759026
4.36364	0.389549	0.14516	0.0990602	0.0938055	0.0751885
4.38068	0.220251	0.173609	0.140976	0.155622	0.141875
4.39773	0.198617	0.15193	0.153482	0.199621	0.207498
4.41477	0.214953	0.127452	0.138734	0.15801	0.172627
4.43182	0.194725	0.101352	0.0811759	0.0592442	0.0489115
4.44886	0.210003	0.102597	0.0571788	0.0706791	0.0317346
4.46591	0.271824	0.136496	0.10516	0.193057	0.15268
4.48295	0.246284	0.209676	0.188699	0.277216	0.245729
4.5	0.0865398	0.246855	0.197471	0.194814	0.163604
4.51705	0.0464587	0.259311	0.176182	0.105981	0.070501
4.53409	0.265267	0.256989	0.210879	0.148633	0.135516
4.55114	0.507099	0.320874	0.35774	0.289615	0.312685
4.56818	0.426804	0.417276	0.494227	0.360791	0.397536
4.58523	0.13426	0.48383	0.523849	0.350517	0.364943
4.60227	0.0565206	0.463252	0.463136	0.33119	0.327121
4.61932	0.258373	0.327532	0.335043	0.294723	0.296369
4.63636	0.425937	0.183881	0.220532	0.221101	0.239832
4.65341	0.34535	0.0827511	0.116455	0.11215	0.128068
4.67045	0.14755	0.0505064	0.0468244	0.0635377	0.0504946
4.6875	0.02305	0.0427354	0.0145151	0.0766643	0.0389441
4.70455	0.000759066	0.0312082	0.00447542	0.0863711	0.0446869
4.72159	0.00407675	0.0334316	0.0135131	0.0624644	0.0313825
4.73864	0.00464394	0.0718583	0.0445658	0.0497529	0.0227942
4.75568	0.0260165	0.110259	0.0727753	0.0718656	0.0413155
4.77273	0.0851277	0.107039	0.0712245	0.107178	0.078206
4.78977	0.17239	0.0649996	0.0465394	0.132334	0.118994
4.80682	0.243885	0.0307633	0.032941	0.136668	0.145177
4.82386	0.225261	0.0455662	0.0559627	0.143504	0.159529
4.84091	0.0954309	0.067562	0.0712197	0.125822	0.130577
4.85795	0.0735515	0.0456223	0.0421908	0.0631721	0.058392
4.875	0.254187	0.0178507	0.0176941	0.0264856	0.0236694
4.89205	0.485441	0.0070269	0.0116681	0.0157574	0.0166726
4.90909	0.516538	0.00856344	0.0143213	0.00668112	0.00735564
4.92614	0.289806	0.010827	0.0166984	0.00862857	0.00960205
4.94318	0.137278	0.00714883	0.0148944	0.0279341	0.0345917
4.96023	0.162983	0.00298563	0.0102913	0.0445104	0.0567674
4.97727	0.187873	0.00316313	0.00199674	0.0294981	0.0395213
4.99432	0.111464	0.0199293	0.010731	0.00272601	0.00485301
5.01136	0.0674654	0.0603411	0.0575578	0.0128295	0.0141573

## Sheet: Figure 9
Fig 9 Data: Units: kg
(a)		(b)
Standard WGHM	Filtered Standard WGHM	Integrated WGHM	Filtered Integrated WGHM
6.79292e+13	6.72466e+13	145387334694392	123899434033949
6.838e+13	6.4363e+13	146362314161182	119576686022125
5.42104e+13	4.31072e+13	126345208402008	9.74079e+13
6.01509e+13	5.19682e+13	131554325992908	105447941532259
7.52664e+13	6.90613e+13	140887292448706	117834702840355
5.1383e+13	4.49944e+13	110941071824718	8.98373e+13
3.40369e+13	3.01485e+13	9.28042e+13	7.43602e+13
2.87023e+13	2.95547e+13	8.78504e+13	7.38723e+13
2.91104e+13	3.48509e+13	8.84393e+13	7.90482e+13
5.88468e+13	6.18764e+13	118265205928561	105656646910877
108381396039105	9.50606e+13	166309861144037	137118235801165
105800214539691	8.7532e+13	161054336560419	129078208564810
73704213923921	5.70379e+13	131770866722223	100944226163185
8.89241e+13	7.74506e+13	149079041206368	122824316076020
9.79826e+13	8.80819e+13	157025803760645	132243553848729
8.50209e+13	8.44607e+13	139877894388474	125473685278578
6.69314e+13	6.59522e+13	116684142277574	103331576891867
5.30456e+13	5.21166e+13	100362921728193	8.77606e+13
5.1606e+13	5.10251e+13	9.94216e+13	8.67859e+13
6.17243e+13	6.09412e+13	109838407422992	9.65813e+13
77533698242659	7.25809e+13	125503225598028	107912943341094
7.31053e+13	6.59951e+13	119038335139594	100641903336763
6.87083e+13	6.04623e+13	113716922645541	9.44575e+13
7.05688e+13	5.81622e+13	116009665840196	9.25193e+13
2.75177e+13	2.27325e+13	6.80785e+13	5.31896e+13
1.23804e+13	1.01066e+13	5.24524e+13	3.97403e+13
7.42466e+12	9.33761e+12	4.74651e+13	3.90673e+13
2.8922e+13	3.03192e+13	6.89488e+13	5.97574e+13
7.87221e+13	68075349651483	118598293933705	9.66589e+13
8.74252e+13	7.03423e+13	124020061261868	9.81865e+13
74083573797838	5.61063e+13	110897600759140	8.41092e+13
5.60924e+13	4.39288e+13	9.50815e+13	7.34045e+13
3.78077e+13	2.71297e+13	7.90339e+13	5.84439e+13
4.95116e+13	43376848887946	9.26452e+13	7.60629e+13
3.84205e+13	3.78856e+13	8.09499e+13	6.9901e+13
2.85921e+13	3.0373e+13	6.80928e+13	6.01546e+13
1.12865e+13	1.34021e+13	4.80957e+13	4.07572e+13
-6.59987e+12	-2.36496e+12	2.95066e+13	2.41298e+13
-1.46332e+13	-7.89214e+12	2.15707e+13	1.85543e+13
1.00004e+13	1.46624e+13	4.56921e+13	4.04627e+13
1.90392e+13	21642299041099	5.56185e+13	4.69272e+13
28678057159578	2.85532e+13	6.34865e+13	5.29844e+13
3.33013e+13	2.71859e+13	6.41316e+13	5.04462e+13
1.88769e+13	1.57041e+13	5.01117e+13	3.94081e+13
-1.13976e+11	-4.20918e+12	3.30377e+13	2.10662e+13
1.70568e+13	1.56818e+13	52048896698413	4.2067e+13
5.31609e+13	4.6651e+13	8.54826e+13	7.09328e+13
4.87827e+13	4.04975e+13	7.60114e+13	6.0939e+13
1.55003e+13	8.15227e+12	3.79427e+13	2.55937e+13
7.02824e+12	3.95444e+12	2.91842e+13	2.10972e+13
2.94554e+13	2.24038e+13	5.2267e+13	3.91569e+13
2.6787e+13	1.93354e+13	4.72683e+13	3.48437e+13
4.42399e+13	3.71196e+13	6.37407e+13	5.23366e+13
8.36389e+13	6.74187e+13	101464834144853	8.1373e+13
7.11509e+13	5.15765e+13	8.80224e+13	6.49754e+13
3.79891e+13	2.58374e+13	5.63204e+13	40336620810647
2.52676e+13	1.52022e+13	45430887801963	3.09971e+13
3.19092e+13	2.56273e+13	5.21873e+13	41390679681737
26409116808382	2.85772e+13	4.51775e+13	4.3097e+13
1.30757e+13	1.61983e+13	2.88645e+13	28491909622007
-1.19475e+13	-9.98425e+12	6.2937e+11	-2.94726e+10
-3.12946e+13	-2.91049e+13	-1.9752e+13	-2.00182e+13
-3.64869e+13	-3.06959e+13	-2.45556e+13	-2.14261e+13
-1.14908e+13	-5.31281e+12	2.03463e+11	3.49877e+12
7.8432e+12	10723717170946	1.99155e+13	1.83043e+13
4.01565e+12	3.80318e+12	1.47326e+13	1.00045e+13
1.41719e+13	6.14193e+12	2.10056e+13	1.13458e+13
-6.09236e+12	-1.20222e+13	5.1939e+11	-6.30318e+12
-9.00312e+12	-7.63365e+12	-1.06849e+12	-8.90687e+11
-1.89784e+12	4.62078e+12	6.46058e+12	1.14425e+13
2.87854e+13	3.34297e+13	34490647980068	3.78854e+13
1.18831e+13	16274442862062	1.24007e+13	1.71061e+13
-1.60063e+13	-1.1175e+13	-1.87709e+13	-1.26222e+13
-2.98374e+13	-2.59393e+13	-3.34912e+13	-2.80252e+13
-23135478925967	-2.03386e+13	-2.63545e+13	-22437261020775
-4.52589e+12	-3.71808e+12	-7.37535e+12	-6.65063e+12
2.42626e+13	15637265720075	2.02761e+13	1.15752e+13
2.85312e+13	1.47857e+13	2.06759e+13	9.60351e+12
33732390734645	1.74896e+13	2.54176e+13	1.19884e+13
1.14778e+13	-4.56311e+11	3.95943e+12	-5.34253e+12
-1.29866e+13	-2.32228e+13	-1.89264e+13	-26819067990255
-2.29878e+13	-2.82251e+13	-2.7145e+13	-3.05979e+13
-2.48264e+13	-2.70268e+13	-2.8886e+13	-29746307974015
-2.79388e+13	-2.39303e+13	-3.53533e+13	-29299938911471
-5.26895e+13	-4.59865e+13	-6.26408e+13	-5.33734e+13
-6.48718e+13	-5.65012e+13	-7.53337e+13	-64253003175191
-68453845002899	-5.51501e+13	-7.81143e+13	-6.25058e+13
-6.71663e+13	-5.07306e+13	-7.69565e+13	-5.84414e+13
-3.349e+13	-2.38965e+13	-4.4177e+13	-3.26147e+13
-2.00314e+13	-1.6578e+13	-2.81911e+13	-2.58296e+13
-2.78071e+13	-2.96281e+13	-4.0728e+13	-4.02262e+13
-34644782450809	-3.76871e+13	-4.69368e+13	-4.70353e+13
-3.51836e+13	-4.32848e+13	-4.62266e+13	-5.14934e+13
-1.93448e+13	-2.90498e+13	-2.92881e+13	-36345153865460
3.46938e+13	1.83749e+13	2.23127e+13	8.9918e+12
16088379687285	1.44279e+13	-1.60808e+12	1.48939e+12
-1.90294e+13	-2.14971e+13	-4.04856e+13	-3.69344e+13
-3.76614e+13	-3.85603e+13	-6.00849e+13	-5.48499e+13
-4.35658e+13	-3.94559e+13	-6.61664e+13	-56181152367322
-1.32762e+13	-1.43673e+13	-3.60707e+13	-3.15487e+13
6.1158e+12	-4.19667e+12	-1.76088e+13	-2.17303e+13
7.76555e+11	-1.32837e+13	-2.29786e+13	-30564120735375
-3.66667e+13	-39733366062081	-5.72725e+13	-54504064839652
-2.90057e+13	-2.28206e+13	-4.79998e+13	-3.66715e+13
-1.16058e+13	-4.32813e+12	-3.1499e+13	-1.91992e+13
9.04027e+12	1.3092e+13	-15410942659787	-5.12541e+12
-2.70886e+13	-2.45972e+13	-5.6108e+13	-4.57056e+13
-5.29734e+13	-4.56194e+13	-8.20885e+13	-6.7444e+13
-4.20792e+13	-3.32015e+13	-7.1537e+13	-5.5624e+13
-2.54024e+13	-2.13782e+13	-5.53784e+13	-4.43735e+13
-6.54814e+13	-6.09604e+13	-9.52951e+13	-8.23816e+13
-5.14214e+13	-3.54176e+13	-8.10334e+13	-5.71117e+13
-4.60727e+13	-3.84041e+13	-8.49447e+13	-6.64734e+13
-6.98284e+13	-5.72513e+13	-109239939151700	-8.58286e+13
-7.01258e+13	-5.50131e+13	-108816589299946	-8.33742e+13
-5.77508e+13	-4.30271e+13	-9.67858e+13	-7.20932e+13
7.10594e+12	2.74245e+12	-34434057247488	-2.8315e+13
7.56642e+12	2.53907e+11	-3.58211e+13	-31570668154073
-1.89098e+13	-2.11297e+13	-6.12216e+13	-5.22098e+13
-3.23422e+13	-2.90522e+13	-7.30765e+13	-5.90207e+13
-2.41333e+13	-13228522154814	-7.43711e+13	-5.03469e+13
-5.20211e+13	-3.42691e+13	-105424981975674	-7.38068e+13
-5.8422e+13	-4.3122e+13	-112611221951447	-8.35992e+13
-69393094542331	-5.31926e+13	-124325668214144	-9.41801e+13
-4.01457e+13	-30336522059674	-9.59711e+13	-7.2359e+13
-1.66914e+13	-1.33481e+13	-7.32281e+13	-5.56101e+13
-9.37599e+12	-1.49161e+13	-6.67394e+13	-5.71317e+13
-3.29764e+13	-3.37992e+13	-8.84879e+13	-7.46737e+13
-6.54415e+13	-57978306890158	-115908612277313	-9.5518e+13
-66995975923939	-5.04528e+13	-117064241513430	-8.82265e+13
-4.46631e+13	-3.55772e+13	-9.92792e+13	-7.66946e+13
-7.50158e+13	-6.31521e+13	-133452234337892	-106808949955562
-7.40003e+13	-5.46217e+13	-134049096583290	-100309478325279
-1.26167e+13	-7.98809e+12	-7.33195e+13	-54999749144764
-50585120276719	-4.82985e+13	-113970207994912	-95605208608648
-3.34774e+13	-2.54724e+13	-9.58159e+13	-7.2216e+13
-3.02856e+12	2.924e+12	-6.79495e+13	-4.60483e+13
-6.52641e+13	-5.91128e+13	-138390391522929	-114177105655363
-7.4237e+13	-6.53558e+13	-147637673204704	-120600477283471
-7.73326e+13	-65390519387880	-150407821912773	-120597537059311
-7.21805e+13	-62756190349310	-145121115525844	-118117453578303
-4.87067e+13	-5.24704e+13	-122881096404989	-108026943751257
-7.23724e+13	-7.1319e+13	-144632102381112	-125561885209469
-9.10363e+13	-8.59045e+13	-161092828383592	-138593200229309
-8.31508e+13	-6.94388e+13	-151595998501112	-121267672582269
-119418670055805	-93568524212378	-194987751374214	-150902520189394
-138219759581221	-113739982442175	-214505812824691	-171751221677143

## Sheet: Figure 14
Fig 14 Data: Units: kg
CSR Mascon	Grid scaling from standard version	Grid scaling from integrated version
7.88317e+13	114855534578065	106057398042501
6.46962e+13	138185835551176	132388026632293
39206013555563	6.8564e+13	6.44229e+13
5.50154e+13	5.51438e+13	5.0893e+13
2.40285e+13	5.52548e+13	4.18586e+13
2.14661e+12	23261878384277	1.3432e+13
-1.96808e+13	1.97961e+13	9.5327e+12
1.1706e+13	4.98492e+13	4.10745e+13
4.12303e+13	7.47232e+13	6.38924e+13
8.66295e+13	114435283034676	104544003021109
6.46139e+13	107025506363608	106415395626513
8.22451e+13	116402814186370	121477376125428
7.42555e+13	88739624857651	8.48739e+13
9.07995e+13	109936672876789	93363045874547
8.75285e+13	117972017342178	101358412236999
5.01697e+13	8.45325e+13	7.12636e+13
2.42635e+13	62869295838951	5.03874e+13
3.13807e+13	7.48902e+13	6.63093e+13
4.01473e+13	6.85102e+13	6.16364e+13
6.38675e+13	109631522826253	9.58394e+13
2.8233e+13	6.96645e+13	6.33417e+13
2.02817e+13	5.54482e+13	5.63497e+13
9.95782e+12	3.64063e+13	45837193742663
-1.76741e+13	2.46321e+13	3.30028e+13
-2.95047e+13	-6.928e+12	-6.16851e+12
-3.50051e+13	-1162924971221	-1.33175e+12
-1.68773e+13	2.84567e+13	2.99905e+13
5.24073e+13	8.70109e+13	8.55082e+13
100215825822793	129944331257148	125155922335007
9.15941e+13	110451878576893	114802575795788
89747227233706	112500147123753	118320266207478
5.79076e+13	6.58484e+13	7.86464e+13
6.98454e+13	9.6016e+13	100206421278604
5.72389e+13	7.68611e+13	7.161e+13
5.17085e+13	6.65113e+13	5.83058e+13
3.0339e+13	5.19158e+13	4.96425e+13
7.7928e+12	2.18052e+13	1.60426e+13
-2.32673e+13	5.46687e+11	-2.26232e+12
-2.48261e+12	2.6867e+13	2.59506e+13
25151452424127	3.02451e+13	3.35408e+13
5.08477e+13	5.73897e+13	6.46309e+13
3.39395e+13	5.02528e+13	6.13458e+13
-1.3433e+13	1.47535e+13	3.13787e+13
-2.68515e+13	-1.07251e+13	8.05137e+12
-1.09214e+13	-1.49265e+11	8.3138e+12
4.74221e+13	4.3851e+13	3.92331e+13
5.5223e+13	4.63603e+13	4.10596e+13
-3.0516e+11	-8.21854e+12	-1.08222e+13
-9.44898e+12	-2.06011e+13	-1.8989e+13
1.58622e+13	2.63643e+13	3.05357e+13
3.10585e+13	1.98728e+13	1.78333e+13
4.51091e+13	4.37526e+13	4.2221e+13
9.07987e+13	9.46511e+13	8.95825e+13
7.07577e+13	7.32152e+13	7.30234e+13
34402443212653	3.02889e+13	3.24574e+13
2.87008e+13	2.17145e+13	2.54853e+13
5.83792e+13	3.28321e+13	3.09431e+13
5.31873e+13	4.31278e+13	3.46307e+13
3.26819e+13	1.80722e+13	1.60204e+13
-3.30806e+12	-2.24147e+13	-2.33067e+13
-2.96356e+13	-5.57974e+13	-6.05891e+13
-3.32934e+13	-5.14024e+13	-5.55427e+13
-8.39595e+12	-3.55105e+13	-3.72737e+13
1.33877e+13	-5.47262e+12	-5.18779e+12
1.13081e+13	-1.78169e+12	-5.78618e+11
6.79033e+12	2.61516e+12	9.59249e+12
-1.53492e+13	-3.35409e+13	-2.27476e+13
-2.75916e+13	-3.19378e+13	-2.40101e+13
-2.39513e+12	2.79116e+12	3.4581e+12
3.51334e+13	4.86498e+13	3.77624e+13
1.64355e+13	8.62086e+12	1.34643e+12
-8.02941e+12	-1.44483e+13	-2.58487e+13
-3.05171e+13	-3.31049e+13	-4.0045e+13
-3.00359e+13	-3.51917e+13	-41357478942636
-1.50538e+13	-10396874294289	-1.26863e+13
-1.65273e+12	1.43579e+12	-3.80069e+12
2.22371e+13	1.79929e+13	2.10394e+13
3.47808e+13	2.72413e+13	2.84921e+13
6.85397e+12	7.14899e+12	8.0619e+12
-27722217368648	-2.77355e+13	-1.49908e+13
-1.24825e+13	-3.85341e+13	-3.05633e+13
-2.69195e+13	-3.30604e+13	-3.39133e+13
-2.37e+13	-36962955918675	-4.16706e+13
-5.42966e+13	-8.75983e+13	-8.74519e+13
-8.12496e+13	-9.77189e+13	-9.52491e+13
-73841751108301	-7.80317e+13	-7.9544e+13
-56071914890553	-7.71292e+13	-70929051893689
-2.72783e+13	-4.0034e+13	-3.41801e+13
-2.83816e+13	-5.27137e+13	-4.4715e+13
-7.13465e+13	-7.49805e+13	-59539658857794
-7.14899e+13	-7.38195e+13	-5.20691e+13
-5.8151e+13	-7.29192e+13	-4.41636e+13
-2.76127e+13	-5.81822e+13	-38885031138002
55075115739115	2.80086e+13	2.54421e+13
4.57626e+13	3.24708e+13	2.97771e+13
4.45123e+12	-1.29711e+12	-4.08404e+12
-2.73626e+13	-3.38764e+13	-3.73152e+13
-3.56704e+13	-4.53884e+13	-4.64378e+13
2.02008e+13	1.67759e+13	1.57707e+13
2.57754e+13	1.86008e+13	2.0731e+13
2.61054e+13	1.5316e+13	2.86642e+13
-3.7893e+12	-2.04195e+13	-1.14273e+13
-1.11079e+13	-3.3623e+13	-2.66379e+13
1.10215e+12	-3.84946e+12	-2.67408e+12
5.02633e+13	3.29766e+13	2.26118e+13
8.82091e+12	-3.84316e+12	-1.31533e+13
-5.41429e+12	-2.27009e+13	-3.18721e+13
-1.76612e+13	-1.86672e+13	-1.9917e+13
-1.75165e+13	-7.38451e+12	-1.20266e+13
7.99143e+12	1.33438e+13	14459248556488
-3.73367e+13	-5.25049e+13	-4.74159e+13
1.51054e+13	-1.21315e+13	-1.57121e+13
-48489957508205	-7.1915e+13	-7.14209e+13
-7.73537e+13	-8.65842e+13	-8.39016e+13
-5.28789e+13	-6.91931e+13	-6.55103e+13
-2.06579e+13	-2.19842e+13	-2.1228e+13
3.49387e+11	-11032997639526	-4.68164e+12
-2.14273e+13	-38586045149240	-2.67227e+13
-4.06025e+13	-5.97617e+13	-4.67995e+13
-3.2384e+13	-34510899472073	-3.02735e+13
-3.54544e+13	-51459406555982	-6.59909e+13
-5.51572e+13	-7.72644e+13	-8.35113e+13
-8.1769e+13	-9.47519e+13	-102178552862741
-6.6767e+13	-6.78114e+13	-75053096232309
-1.10836e+13	-1.75122e+13	-2.01694e+13
-1.73294e+13	-2.10155e+13	-2.08218e+13
4.51307e+11	-1.56026e+13	-1.23899e+13
-3.72884e+13	-4.87734e+13	-4.19952e+13
-46843038160772	-60667127667035	-6.20027e+13
-3.4516e+13	-5.57671e+13	-5.91893e+13
-51124996091309	-7.61559e+13	-7.83264e+13
-7.09953e+13	-8.49604e+13	-8.98513e+13
-1.91074e+13	-2.36628e+13	-2.93905e+13
6.38719e+12	3.16873e+12	5.64616e+12
6.48941e+12	-8.33098e+12	-9.14233e+12
34279386943308	1.35189e+13	7.43675e+12
-1.6355e+13	-4.06432e+13	-4.57509e+13
-8.33202e+13	-8.62002e+13	-86469937968719
-6.87958e+13	-9.44797e+13	-9.24857e+13
-6.26937e+13	-7.97797e+13	-7.6651e+13
-4.26751e+13	-5.91576e+13	-5.79809e+13
-6.37676e+13	-9.34085e+13	-8.03278e+13
-82757552947028	-112356098553906	-9.5537e+13
-6.73467e+13	-9.66885e+13	-8.96603e+13
-2.85209e+13	-7.10779e+13	-7.56585e+13
-122504750760827	-159636333475081	-157774749803562
-142009823866605	-178264305314083	-166377682632049

## Sheet: Figure 15
Fig 15 Data: Units: kg
CSR Mascon	Frequency dependant scaling from standard version	Frequency dependant scaling from integrated version
7.88317e+13	9.00479e+13	9.45201e+13
6.46962e+13	9.85866e+13	102563935301866
39206013555563	4.96199e+13	5.40399e+13
5.50154e+13	3.75494e+13	4.2194e+13
2.40285e+13	3.06323e+13	3.52781e+13
2.14661e+12	3.74774e+12	8.31471e+12
-1.96808e+13	1.52495e+13	1.98297e+13
1.1706e+13	2.54031e+13	3.00778e+13
4.12303e+13	4.61824e+13	5.08339e+13
8.66295e+13	8.81592e+13	9.24938e+13
6.46139e+13	80079944905746	8.38647e+13
8.22451e+13	8.61117e+13	8.94043e+13
7.42555e+13	7.53781e+13	7.87538e+13
9.07995e+13	9.91627e+13	102916028425138
8.75285e+13	9.69969e+13	100987537721493
5.01697e+13	6.1044e+13	6.50385e+13
2.42635e+13	4.23089e+13	4.62127e+13
3.13807e+13	4.56057e+13	4.95026e+13
4.01473e+13	4.4618e+13	4.85936e+13
6.38675e+13	7.80405e+13	8.19896e+13
2.8233e+13	4.48187e+13	4.84579e+13
2.02817e+13	3.11925e+13	3.42903e+13
9.95782e+12	1.80163e+13	2.06253e+13
-1.76741e+13	6.04979e+12	8.51094e+12
-2.95047e+13	-3.17774e+13	-2.85372e+13
-3.50051e+13	-2.72846e+13	-2.40714e+13
-1.68773e+13	-7.33502e+11	2.54238e+12
5.24073e+13	6.141e+13	6.46561e+13
100215825822793	101716128223581	104659663550771
9.15941e+13	8.79617e+13	9.03728e+13
89747227233706	9.35021e+13	9.54285e+13
5.79076e+13	5.47177e+13	5.6497e+13
6.98454e+13	82272469657340	8.42924e+13
5.72389e+13	67935549912233	7.03557e+13
5.17085e+13	5.24822e+13	5.51638e+13
3.0339e+13	3.27125e+13	3.54032e+13
7.7928e+12	9.17347e+12	1.17498e+13
-2.32673e+13	-1.10599e+13	-8.53083e+12
-2.48261e+12	1.2063e+13	1.46386e+13
25151452424127	1.57593e+13	1.83016e+13
5.08477e+13	3.95554e+13	4.18029e+13
3.39395e+13	3.27719e+13	3.44966e+13
-1.3433e+13	4.33806e+12	5.58278e+12
-2.68515e+13	-2.28756e+13	-2.17771e+13
-1.09214e+13	-3.28976e+12	-1.94661e+12
4.74221e+13	4.87704e+13	5.0524e+13
5.5223e+13	5.3716e+13	5.57425e+13
-3.0516e+11	-3.33298e+12	-1.29492e+12
-9.44898e+12	-1.54895e+13	-1.35775e+13
1.58622e+13	19453923353537	21298383473419
3.10585e+13	1.91483e+13	21022894746158
4.51091e+13	40535831401996	4.23738e+13
9.07987e+13	8.57208e+13	8.72721e+13
7.07577e+13	6.62935e+13	6.73322e+13
34402443212653	2.72316e+13	2.77957e+13
2.87008e+13	1.82026e+13	1.86216e+13
5.83792e+13	4.91045e+13	4.97715e+13
5.31873e+13	5.63311e+13	5.74182e+13
3.26819e+13	2.34097e+13	2.47806e+13
-3.30806e+12	-8.78594e+12	-7.40106e+12
-2.96356e+13	-4.31722e+13	-4.1925e+13
-3.32934e+13	-4.29503e+13	-4.17908e+13
-8.39595e+12	-2.76551e+13	-2.64819e+13
1.33877e+13	3.45305e+12	4.58614e+12
1.13081e+13	7.98729e+12	8.84196e+12
6.79033e+12	8.78684e+12	9.14008e+12
-1.53492e+13	-2.10053e+13	-2.11209e+13
-2.75916e+13	-2.10339e+13	-2.12935e+13
-2.39513e+12	4.91591e+12	4.90748e+12
3.51334e+13	5.1528e+13	5.19486e+13
1.64355e+13	5.40045e+12	6.11538e+12
-8.02941e+12	-1.5393e+13	-1.46619e+13
-3.05171e+13	-3.80983e+13	-3.75164e+13
-3.00359e+13	-3.57128e+13	-3.52388e+13
-1.50538e+13	-1.16918e+13	-1.12206e+13
-1.65273e+12	-1.62132e+12	-1.19367e+12
2.22371e+13	1.99257e+13	2.00836e+13
3.47808e+13	2.76387e+13	2.73068e+13
6.85397e+12	9.19204e+12	8.39775e+12
-27722217368648	-2.32285e+13	-2.41655e+13
-1.24825e+13	-2.544e+13	-2.61232e+13
-2.69195e+13	-2.97327e+13	-29978583720022
-2.37e+13	-3.03915e+13	-3.03331e+13
-5.42966e+13	-7.93058e+13	-7.92291e+13
-8.12496e+13	-93498603478563	-9.35824e+13
-73841751108301	-7.72197e+13	-7.74315e+13
-56071914890553	-6.78301e+13	-6.80614e+13
-2.72783e+13	-4.08283e+13	-4.11066e+13
-2.83816e+13	-4.7976e+13	-4.8515e+13
-7.13465e+13	-6.9268e+13	-7.02846e+13
-7.14899e+13	-7.12712e+13	-7.27432e+13
-5.8151e+13	-6.86919e+13	-7.03052e+13
-2.76127e+13	-5.32885e+13	-5.46458e+13
55075115739115	4.27689e+13	4.18565e+13
4.57626e+13	3.54117e+13	3.4813e+13
4.45123e+12	2.4187e+12	1.84044e+12
-2.73626e+13	-2.77391e+13	-2.84891e+13
-3.56704e+13	-3.89552e+13	-3.98532e+13
2.02008e+13	1.92932e+13	1.83085e+13
2.57754e+13	2.70899e+13	2.58537e+13
2.61054e+13	2.14445e+13	19743640659566
-3.7893e+12	-6.85843e+12	-9.00708e+12
-1.11079e+13	-2.26329e+13	-24663609229950
1.10215e+12	1.83384e+12	2.54925e+11
5.02633e+13	48978802177282	4.77225e+13
8.82091e+12	9.66384e+12	8.42989e+12
-5.41429e+12	-9.96045e+12	-1.13772e+13
-1.76612e+13	-1.48201e+13	-1.64575e+13
-1.75165e+13	-4.26541e+12	-5.95694e+12
7.99143e+12	1.66561e+13	1.47227e+13
-3.73367e+13	-3.36672e+13	-3.59127e+13
1.51054e+13	3.53679e+12	1.6223e+12
-48489957508205	-5.04803e+13	-52564235453957
-7.73537e+13	-7.19705e+13	-7.42421e+13
-5.28789e+13	-5.59521e+13	-5.82933e+13
-2.06579e+13	-1.41476e+13	-1.65463e+13
3.49387e+11	-1.32591e+12	-4.394e+12
-2.14273e+13	-2.73066e+13	-3.08056e+13
-4.06025e+13	-4.07167e+13	-4.4352e+13
-3.2384e+13	-22336815344702	-2.57124e+13
-3.54544e+13	-3.45257e+13	-3.70732e+13
-5.51572e+13	-63618009209867	-6.63698e+13
-8.1769e+13	-7.83373e+13	-8.12962e+13
-6.6767e+13	-5.87218e+13	-6.1767e+13
-1.10836e+13	-1.45384e+13	-1.78667e+13
-1.73294e+13	-1.49982e+13	-1.87493e+13
4.51307e+11	-5.9529e+12	-1.01257e+13
-3.72884e+13	-3.74774e+13	-4.17846e+13
-46843038160772	-4.77451e+13	-5.13241e+13
-3.4516e+13	-41044796041552	-4.42776e+13
-51124996091309	-6.08079e+13	-6.40133e+13
-7.09953e+13	-7.15875e+13	-7.50076e+13
-1.91074e+13	-1.6754e+13	-2.07799e+13
6.38719e+12	3.56589e+12	-8.6764e+11
6.48941e+12	-2.98078e+12	-7.69862e+12
34279386943308	33223421121898	2.89775e+13
-1.6355e+13	-22405137089978	-2.62982e+13
-8.33202e+13	-6.90721e+13	-7.34068e+13
-6.87958e+13	-7.56767e+13	-8.01309e+13
-6.26937e+13	-5.90447e+13	-6.35669e+13
-4.26751e+13	-3.57447e+13	-4.04682e+13
-6.37676e+13	-7.16085e+13	-7.71258e+13
-82757552947028	-9.06929e+13	-9.63405e+13
-6.73467e+13	-68283043540792	-7.36711e+13
-2.85209e+13	-4.46335e+13	-4.95465e+13
-122504750760827	-127279393856637	-132038060899659
-142009823866605	-157457973112096	-162480992971878
